# Supplementary material
Source: MDPI journal article supplement (https://www.mdpi.com/2311-7524/8/11/1084)
Supplement: s1 [file s1]

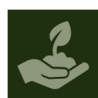

## Supplementary Material

Table S1. Qualitative and quantitative methods for the quantification of anthocyanins

| Separation<br>and detection<br>techniques                                        | Column*                                          | Mobile phase                                   |                                              | Q    | V         | $\tau$ | Elution gradient                                                                                                                                                                                                                       | Ref. |
|----------------------------------------------------------------------------------|--------------------------------------------------|------------------------------------------------|----------------------------------------------|------|-----------|--------|----------------------------------------------------------------------------------------------------------------------------------------------------------------------------------------------------------------------------------------|------|
|                                                                                  |                                                  | Solvent A                                      | Solvent B                                    |      |           |        |                                                                                                                                                                                                                                        |      |
| HPLC-PDA<br>1260 Infinity II<br>model<br>(Agilent Co.,<br>Palo Alto, CA,<br>USA) | Zorbax<br>Eclipse XDB-<br>C18 (4.6×250)          | 1 % TFA in<br>H <sub>2</sub> O                 | 1 % TFA in<br>ACN                            | 1.0  | 20        | 70     | 10 % B (0 min), 12 % B (6.5 min),<br>13 % B (10.5 min), 17 % B (33<br>min), 65 % B (60 min), 95 % B<br>(70 min)                                                                                                                        | [77] |
| HPLC-PDA-<br>ESI-MS<br>(Shimadzu,<br>USA)                                        | Kinetex F5<br>(50 × 2.1, 1.7)                    | ultrapure<br>H <sub>2</sub> O with<br>2% FA    | ACN with<br>2% FA                            | NR   | 2 $\mu$ L | 2      | 10 % B (0 min); 0-20 % B (0-2<br>min); 20 - 10 % B (2-2.1 min);<br>10 % B (2.1-3.1 min)                                                                                                                                                | [23] |
| HPLC-PDA<br>(Shimadzu, Ja-<br>pan)                                               | C18<br>(250×4.60, 5)                             | 2% acetic<br>acid                              | 2% TFA in<br>MeOH                            | 1    | 10        | 45     | 2-20% B (0-10 min), 20-25% B<br>(10-20 min), 25-35% B (20-25<br>min), 35-75% B (25-35 min), 75%<br>B (35-45 min)                                                                                                                       | [57] |
| HPLC-ESI-MS<br>(Agilent Tech-<br>nologies, USA)                                  | Inertsil<br>ODS3- C <sub>18</sub><br>(50×4.0, 3) | 10% FA                                         | 100%<br>MeOH                                 | 1    | 5         | 25     | 95% A/5% B - 60% A/40% B, (0-<br>20 min); 60% A/40% B -0%<br>A/100% B (20-25 min)                                                                                                                                                      | [64] |
| HPLC-PDA-<br>MS/MS<br>(Shimadzu, Ja-<br>pan)                                     | Waters C <sub>18</sub><br>(250×4.6, 5)           | deionized<br>H <sub>2</sub> O with<br>5% FA    | ACN: H <sub>2</sub> O<br>(1:1) with<br>5% FA | 0.8  | 5         | 45     | 20-40% B (0-30 min), 40-50% B<br>(30- 35 min), 50% (35-45 min),<br>20% (45min)                                                                                                                                                         | [69] |
| UHPLC-ESI-<br>MS/MS<br>(Thermo<br>Fisher Scien-<br>tific, USA)                   | Phenomenex<br>Kinetex C18<br>(2.1 x 30, 1.7)     | H <sub>2</sub> O with<br>1% FA                 | ACN cu 1%<br>FA                              | 0.35 | 1         | 7      | 10% B (0 min), 10% B (0-1 min),<br>50% B (1-5 min), 50- 10% (5-5.1<br>min), 10% B (5.1 min)                                                                                                                                            | [52] |
| UHPLC<br>(Milford, MA,<br>USA)                                                   | Waters Cor-<br>tex UPLC<br>C18<br>(4.6×50, 2.7)  | ACN                                            | 5% MeOH<br>and 0.1%<br>FA                    | 0.25 | 10        | 20     | 0-2% A (0-2 min), 2-7% A (2-5<br>min), 7-13% A (5-7 min), 13-20%<br>A (7-9 min), 20-55% A (9-11.5<br>min), 55-90% A (11.5-13.5 min),<br>90% A (13.5-14.5 min), 90-3% A<br>(14.5-14.95 min), 3% A (14.95-18<br>min), 3-0% A (18-20 min) | [21] |
| HPLC                                                                             | Lichrospher<br>100 RP 18<br>(125×4, 5)           | ultrapure<br>H <sub>2</sub> O with<br>0.1% TFA | MeOH with<br>0.1% TFA                        | 1    | 20        | 25     | 5% - 65% B (0-25 min)                                                                                                                                                                                                                  | [59] |

|                                                                                                           |                                                        |                                             |                                           |     |    |     |                                                                                                                                                               |      |
|-----------------------------------------------------------------------------------------------------------|--------------------------------------------------------|---------------------------------------------|-------------------------------------------|-----|----|-----|---------------------------------------------------------------------------------------------------------------------------------------------------------------|------|
| (Hitachi Fontenay-sous-Bois, France)                                                                      |                                                        |                                             |                                           |     |    |     |                                                                                                                                                               |      |
| LC/DAD-MS<br>Accela                                                                                       | LichroCART<br>C18<br>(4×4, 5)                          | H <sub>2</sub> O: FA<br>(99:1)              | FA: H <sub>2</sub> O:<br>ACN<br>(1:69:30) | 0.3 | NR | 90  | 20-85% B (70 min)<br>100% B (10 min) and stabilized<br>with the initial conditions for<br>another 10 minutes                                                  | [46] |
| UHPLC-DAD-<br>MS/MS<br>(Waters, Mill-<br>ford, US)                                                        | Agilent C18<br>(2.1×50, 1.7)                           | 0.05% FA                                    | ACN                                       | NR  | NR | 14  | 2-11% B (0-2 min), 11-16% B (2-8<br>min), 16-2% B (8-9 min), 2% B<br>(9-14 min)                                                                               | [36] |
| HPLC-DAD-<br>ESI-MS<br>Agilent 1260<br>(Agilent Tech-<br>nologies, Ger-<br>many)                          | Agilent Po-<br>roshell 120<br>EC-C18<br>(100×3.0, 2.7) | 0.2% FA in<br>ultrapure<br>H <sub>2</sub> O | ACN                                       | 0.6 | 5  | 26  | 13% B (9 min), 13% - 27% B (5<br>min), 27% - 40% B (5 min), 40% -<br>50% B (7 min)                                                                            | [47] |
| HPLC-DAD<br>Agilent 1100<br>Series<br>(Agilent, San<br>Jose, CA, USA)                                     | C18<br>(250×4.6, 5)                                    | H <sub>2</sub> O: FA<br>(95:5)              | ACN: FA<br>(95:5)                         | 1   | NR | 34  | 10-35% B (0-25 min), 35-100% B<br>(25-26 min), 100% B (26-28 min),<br>100-10% B (28 -29 min), column<br>rebalancing (5 min)                                   | [48] |
| RP-HPLC<br>Agilent 1100<br>system<br>(Agilent Tech-<br>nologies, Palo<br>Alto, CA,<br>USA)                | SUPERLC-<br>OSILTM LC-<br>18<br>(4.6 ×250, 5)          | 0.1% FA                                     | FA in 0.1%<br>ACN                         | 0.5 | 50 | 65  | 100% A (0 min), 90% A (5 min),<br>85% A (35 min), 60% A (45 min);<br>maintain at 60% A (45 - 50 min);<br>60-100% A (55 min), equilibra-<br>tion (55 - 65 min) | [51] |
| HPLC-DAD<br>(Shimadzu,<br>Kyoto, Japan)                                                                   | XBridge C18<br>(150×2.1, 3.5)                          | H <sub>2</sub> O: FA<br>(99.4:0.6)          | ACN: FA<br>(99.4:0.6).                    | 0.2 | NR | 105 | 3-17% B (0-77 min), 17-80% B<br>(77-80 min), 80-3% B (80-84<br>min), 3% B (84-105 min)                                                                        | [66] |
| HPLC-DAD<br>Agilent 1260<br>Infinity system<br>(Agilent Tech-<br>nology Inc.,<br>Santa Clara,<br>CA, USA) | Cortecs C18<br>(4.6 × 150,<br>2.7)                     | 5% FA in<br>H <sub>2</sub> O                | 5% FA in<br>MeOH                          | 0.6 | NR | 59  | 2-20% B (0-25 min), 20-33% B<br>(25-48 min), 33-100% B (48 -<br>49 min), 100% B (5 min), 100-2%<br>B (54 -55 min), 2% B (5 min)                               | [67] |
| HPLC-ESI-MS<br>Agilent 1200<br>(Agilent Tech-<br>nology Inc.,                                             | Inertsil ODS-<br>3 C18<br>(4.0×150, 3)                 | 10 % FA                                     | 100 %<br>MeOH                             | 0.5 | 5  | 45  | 95 % A/5 % B la 60 % A/40 % B<br>(0-20 min) and 60 % A/40 % B la<br>0 % A/100 % B (20-25 min)                                                                 | [38] |

|                                                                          |                                                  |          |                   |     |    |      |                                                                                                                                                                                           |         |  |
|--------------------------------------------------------------------------|--------------------------------------------------|----------|-------------------|-----|----|------|-------------------------------------------------------------------------------------------------------------------------------------------------------------------------------------------|---------|--|
| Santa Clara,<br>CA, USA)                                                 |                                                  |          |                   |     |    |      |                                                                                                                                                                                           |         |  |
| HPLC-ESI-<br>MS/MS Ag-<br>ilent<br>(Santa Clara,<br>California,<br>USA). | C18 UFLC<br>Aqueous<br>(2.1×150, 3).             | 1 % FA   | MeOH              | NR  | NR | 40   | 0/5, 20/55, 21/100, 26/100, 27/5<br>and 40/5 (min / % solvent B)                                                                                                                          | [80]    |  |
| UPLC<br>(G2-XS QTof,<br>Waters, USA).                                    | ACQUITY<br>UPLC BEH<br>C18<br>(2.1×100,<br>1.70) | 0.1 % FA | ACN cu<br>0.1% FA | 0.4 | 2  | 17.5 | 95% A (0-0.5 min), 95%-5% A<br>(0.5-15.5 min), 5% A (15.5-17.5<br>min)                                                                                                                    | [10]    |  |
| HPLC-PAD<br>(Waters Corp,<br>Milford, MA)                                | C18<br>(250×4.6, 5)                              | 0.1% TFA | ACN               | 1.0 | NR | 60   | 4% - 7% B (0-2 min); 7% - 0% B<br>(2-67 min); 20% - 35% B (67-<br>79 min); 30% - 90% B (79-<br>81 min); 90% B (81-90 min)                                                                 | [84]    |  |
| HPLC<br>Agilent                                                          | A C-18 core-<br>shell<br>(3×150, 2.7)            | FA       | ACN               | 0.4 | NR | 45   | 90% A (0-5 min), 90-75% A (5-20<br>min), 75-65% A (20-25 min), 65-<br>42% A (25-31 min), 42-40% A<br>(31-34 min), 40-10% A (34-40<br>min), 10-90% A (40-50 min), 90-<br>90% A (50-60 min) | [81,82] |  |
| HPLC Hitachi<br>L-7250<br>(Hitachi High<br>Technologies,<br>USA)         | Grace Prevail<br>C <sub>18</sub><br>(250×4.6, 5) | 2% FA    | 100% ACN          | 1   | NR | 45   | 95% A (0 min), 70% A (25 min),<br>45% A (35 min), 0% A (42 min),<br>maintaining 3 min                                                                                                     | [79]    |  |

Flow rate (mL/min) - Q; Injection volume (μl) - V; Program duration (min) – τ; Not reported -NR; \* Column (length × diameter (mm); particle size (μm)); formic acid -FA; High-Performance Liquid Chromatography - HPLC; Reverse Phase - RP; Ultra High-Performance Liquid Chromatography – UHPLC; Liquid Chromatography – LC; Pulsed Amperometric Detector - PDA; Diode-Array Detector – DAD; Photodiode-Array Detection – PDA; Electrospray Ionization – ESI; Mass Spectrometry – MS.
